# Supplementary material
Source: PubMed Central journal article supplement (PMC2657399)
Supplement: 0812432106_0812432106SI.pdf [file 0812432106_0812432106SI.pdf]

# Supporting Information

Yi et al. 10.1073/pnas.0812432106

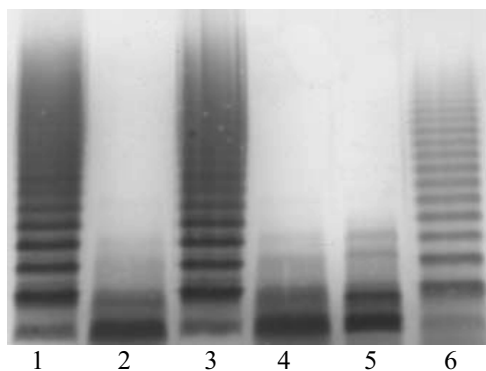

**Fig. S1.** Disruption of GDP-fucose de novo pathway and complementation with salvage pathway. Lane 1. LPS from wild-type *E. coli* O86; lane 2. Disruption of de novo pathway (gmd-fcI); lane 3. complementation of de novo pathway with pTRC99A-f; lane 4. complemented with salvage pathway (pET15b-fkp), grown in LB without sugar supplement; lane 5. complemented with salvage pathway (pET15b-fkp), grown in LB supplemented with 0.1% glucose; lane 6. complemented with salvage pathway (pET15b-fkp), grown in LB supplemented with 0.1% fucose.

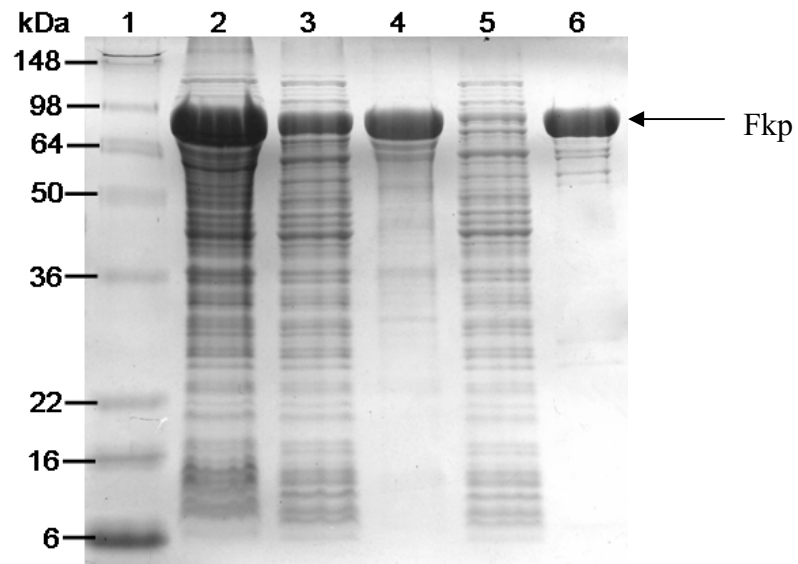

**Fig. S2.** Expression and purification of Fkp. Lane 1. Protein Standard; lane 2. Proteins in whole cell of Fkp-expressing BL21(DE3); lane 3. Soluble protein fractions; lane 4. Inclusion body; lane 5. Flow-through from Ni-affinity purification; lane 6. Eluted Fkp from Ni-affinity purification.

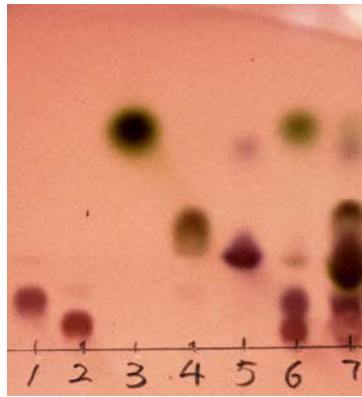

**Fig. S3.** In vitro Fkp reaction with fucose as substrate. Lane 1. ATP; lane 2. GTP; lane 3. L-fucose; lane 4. GDP-fucose; lane 5. ADP; lane 6. starting point of GDP-fucose synthesis reaction; lane 7. GDP-fucose synthesis reaction after 30 min.

A. Fucose, compound 1, product MS (ESI): 588.2

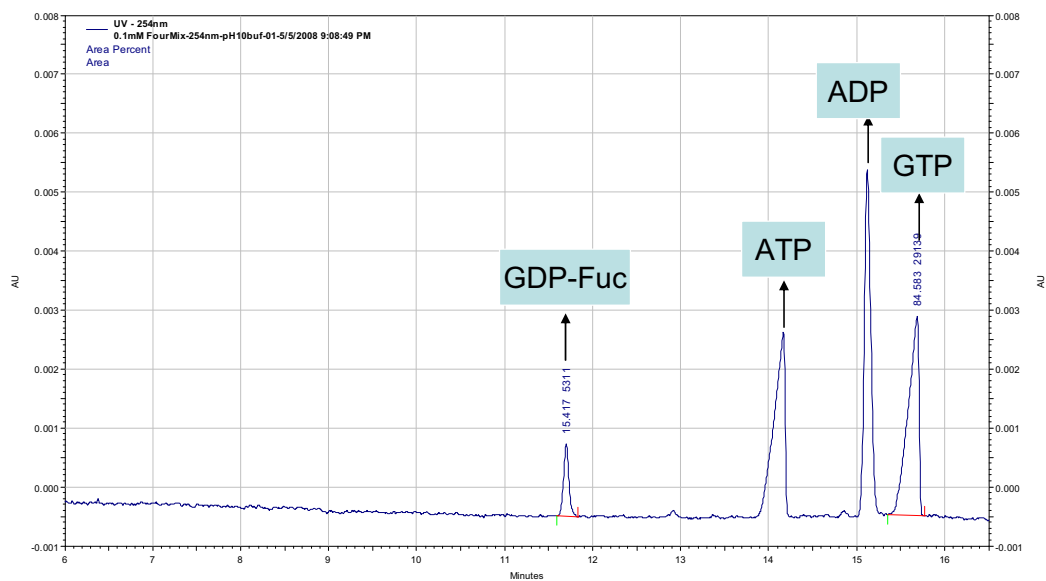

[1]

B. compound 2, product MS (ESI): 574.1

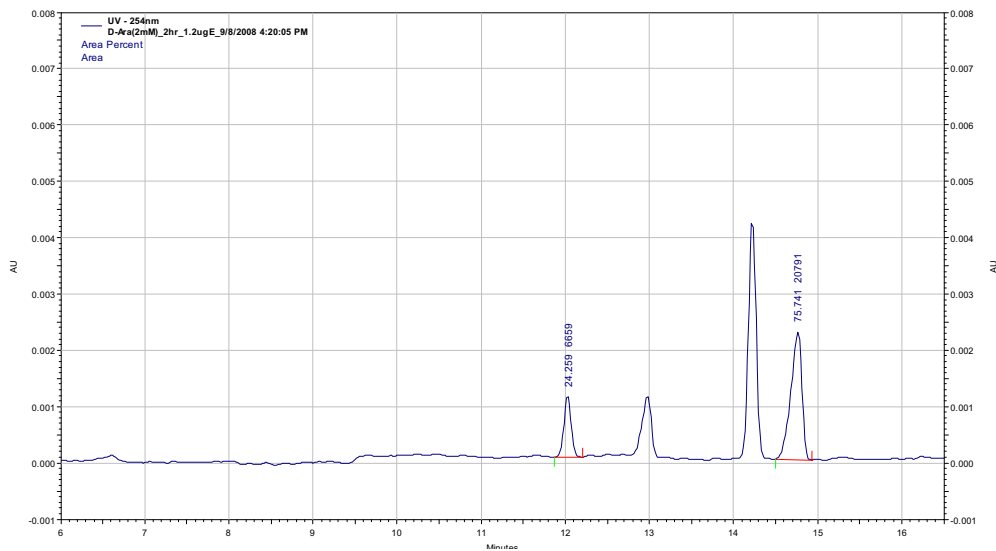

Fig. S4. Capillary electrophoresis analysis of Fkp reactions with various fucose analogs.

C. compound 3, product MS (ESI): 604.2

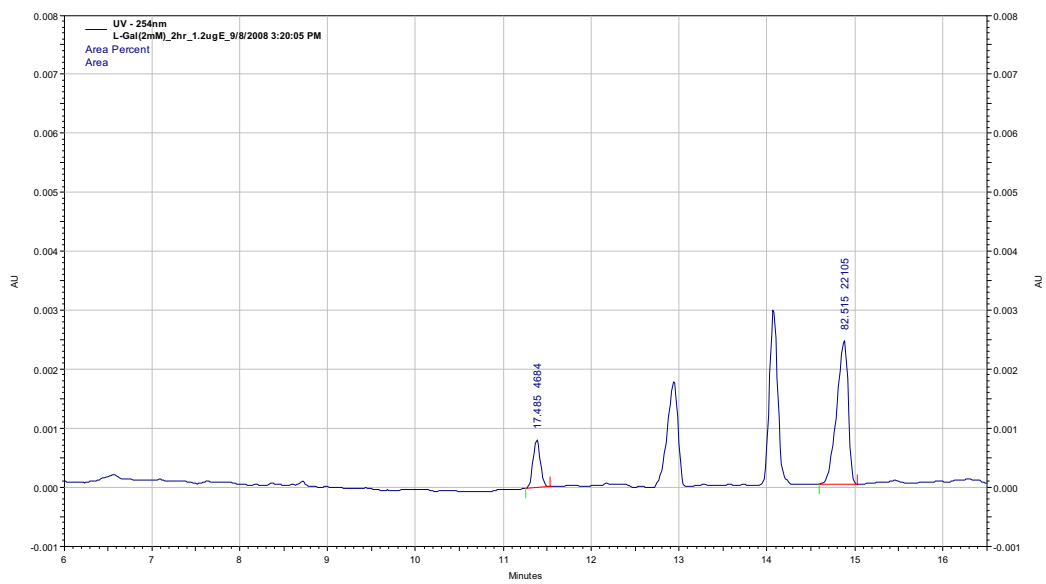

D. compound 4, product MS (ESI): 629.1

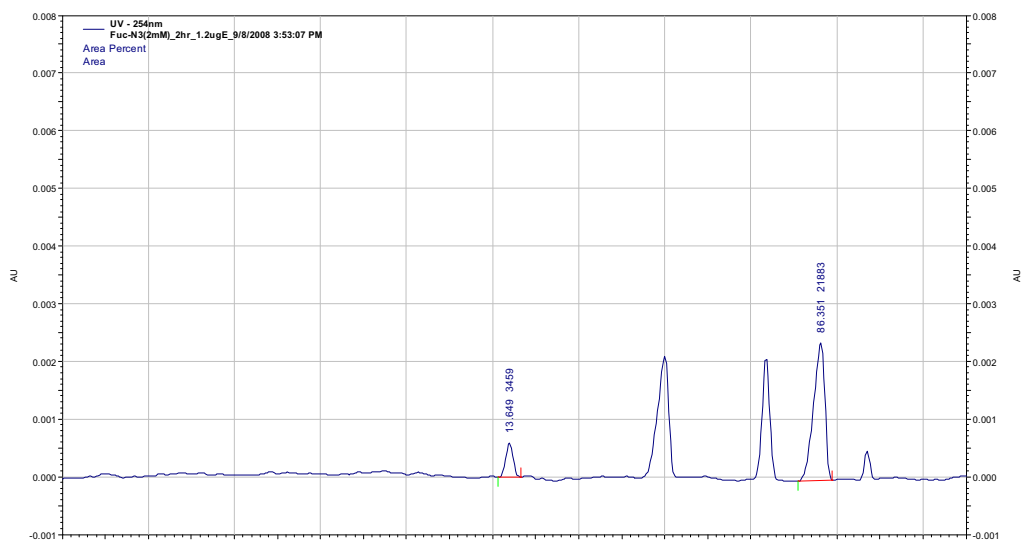

Fig. S4. (continued).

E. compound **5**, product MS (ESI): 603.2

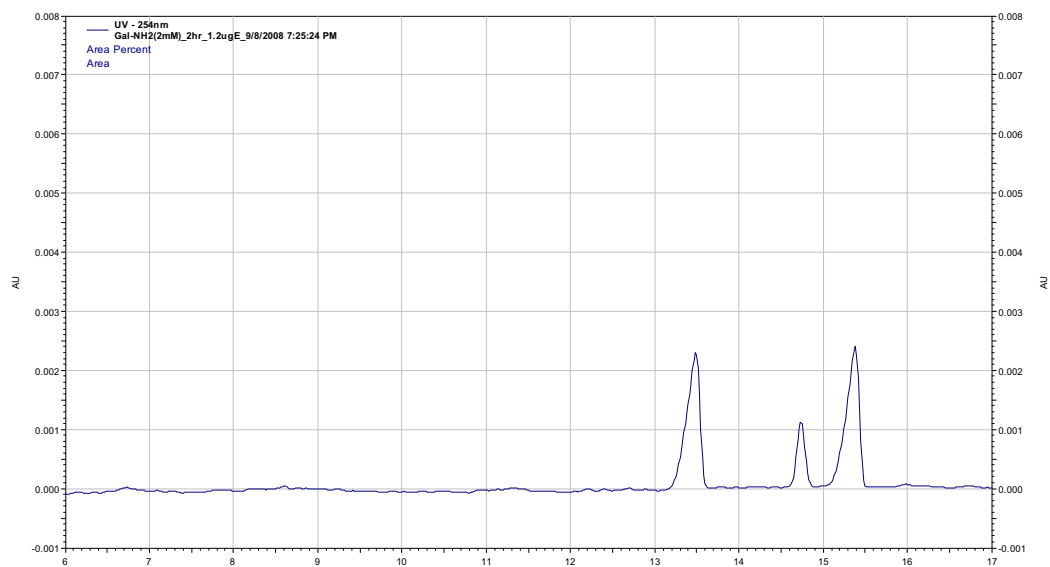

F. compound **6**, product MS (ESI): 602.1

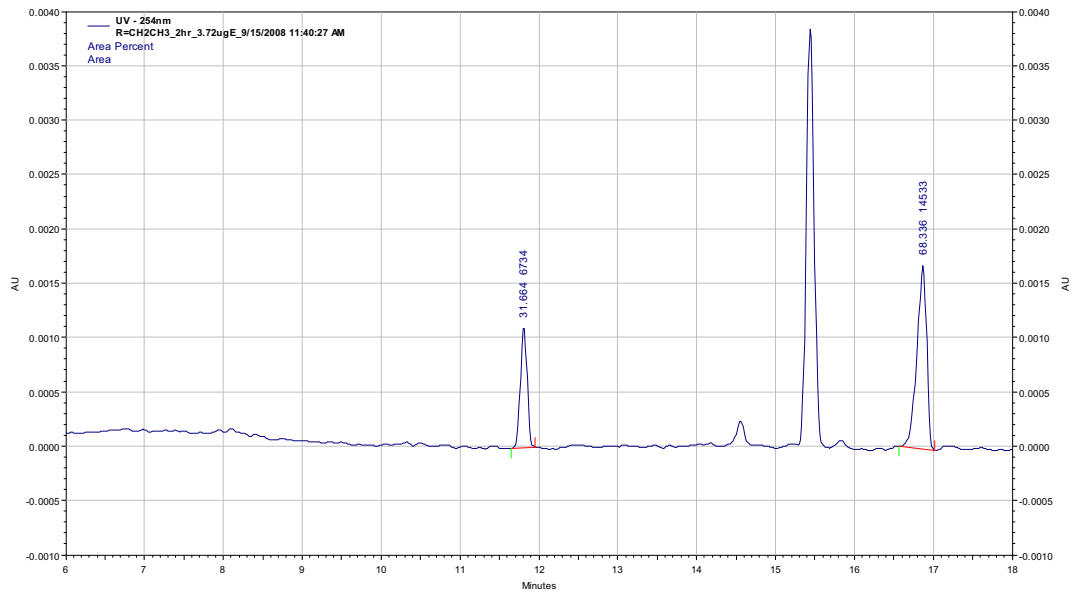

Fig. S4. (continued).

G. compound 7, product MS (ESI): 618.2

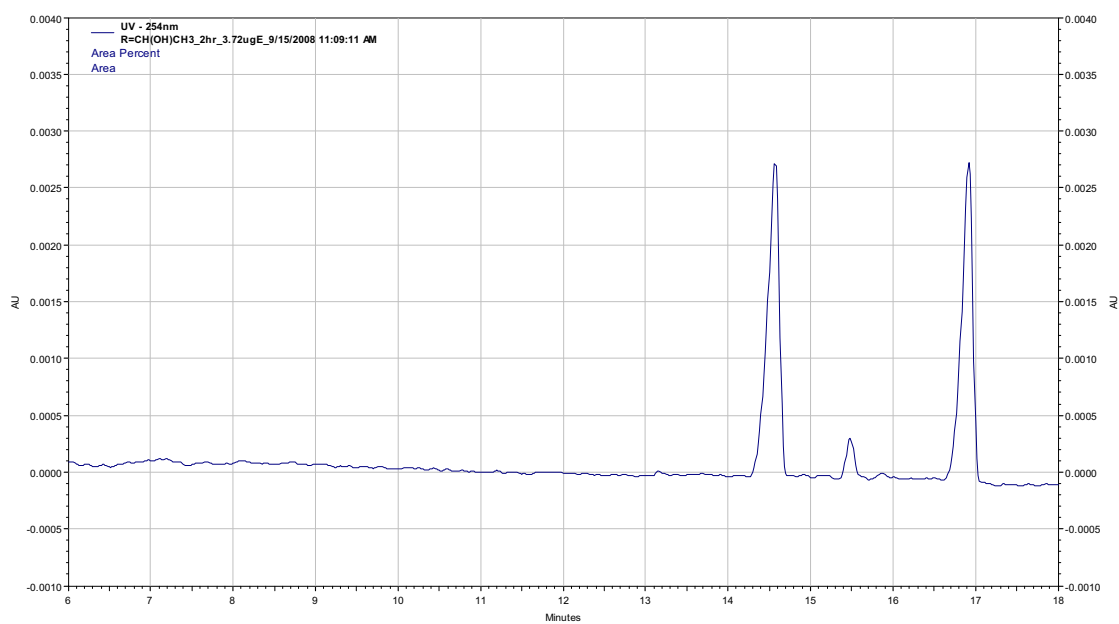

H. compound 8, product MS (ESI): 616.1

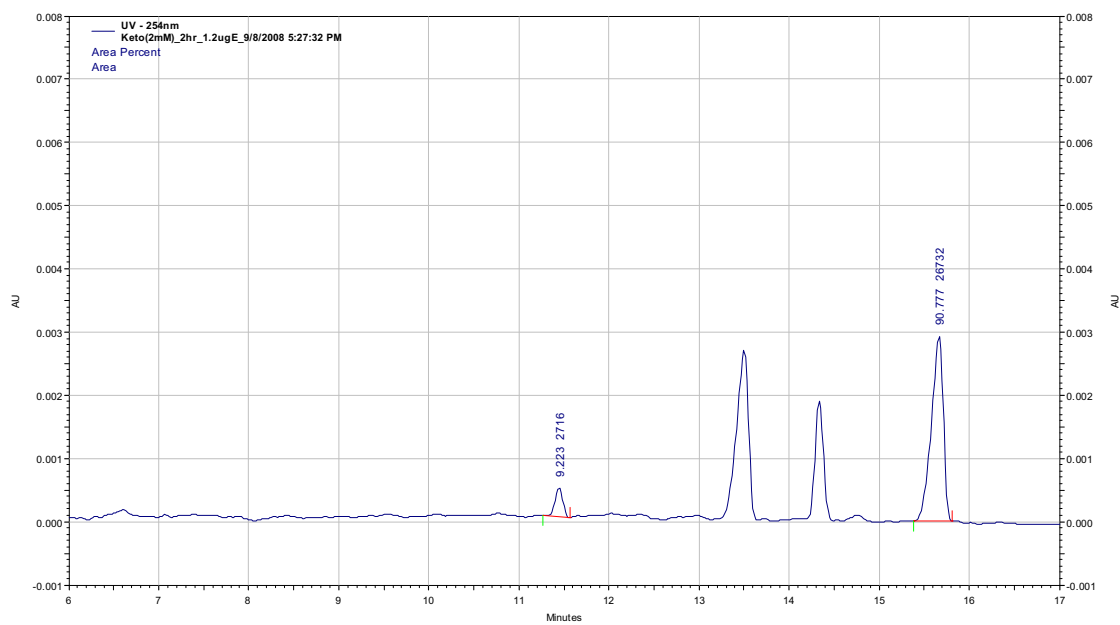

Fig. S4. (continued).

I. compound **9**, product MS (ESI): 602.3

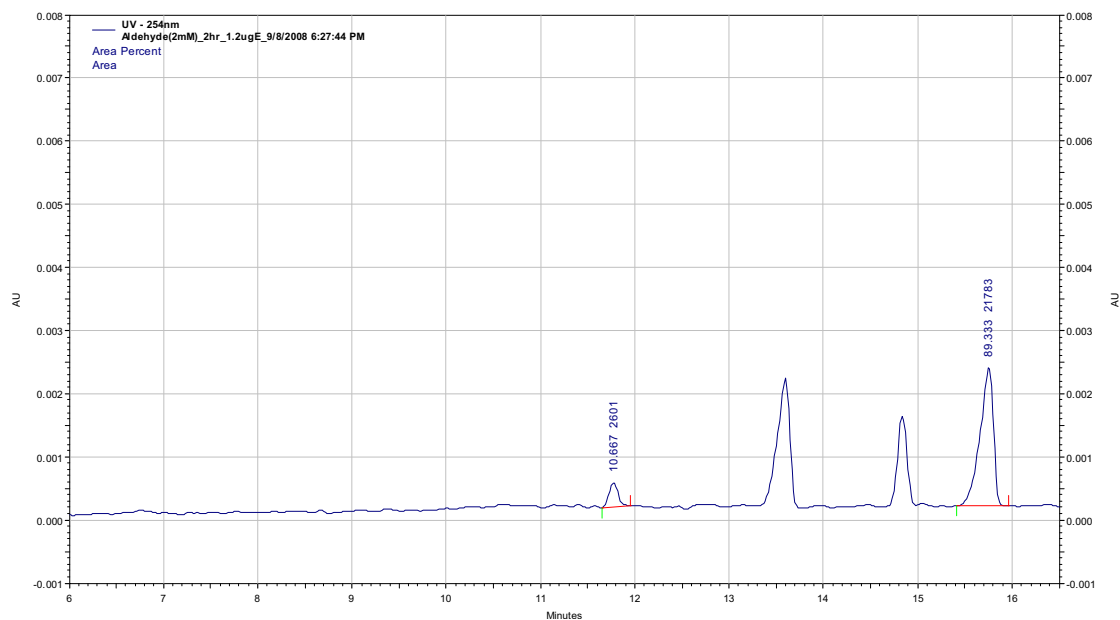

J. compound **10**, product MS (ESI): 598.2

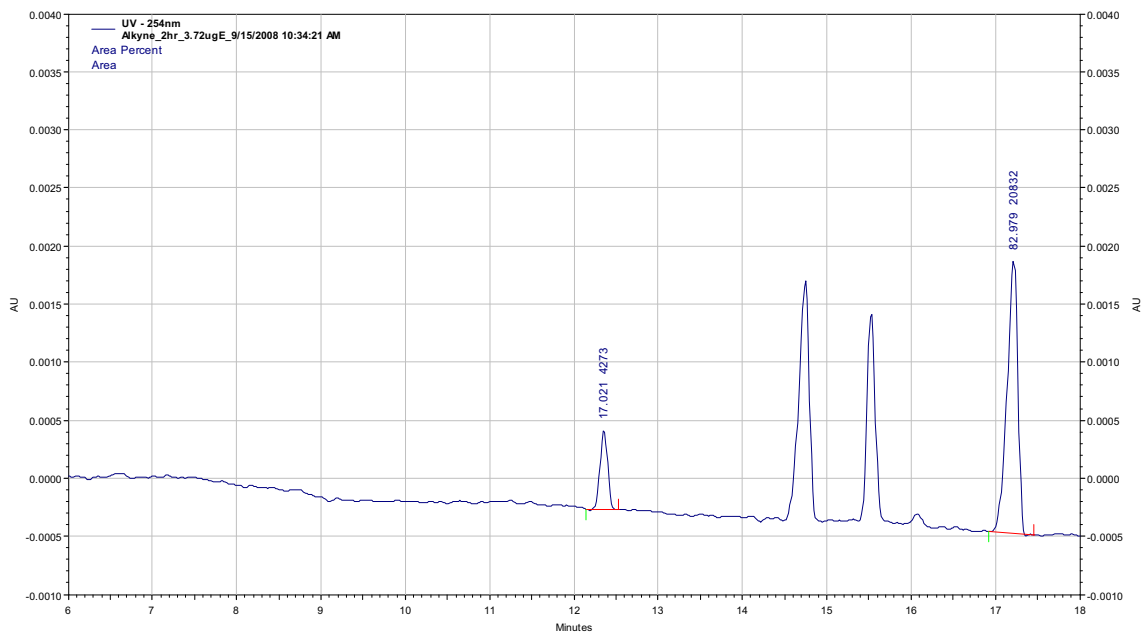

Fig. S4. (continued).



A. MS spectrum of LPS (compound 1).

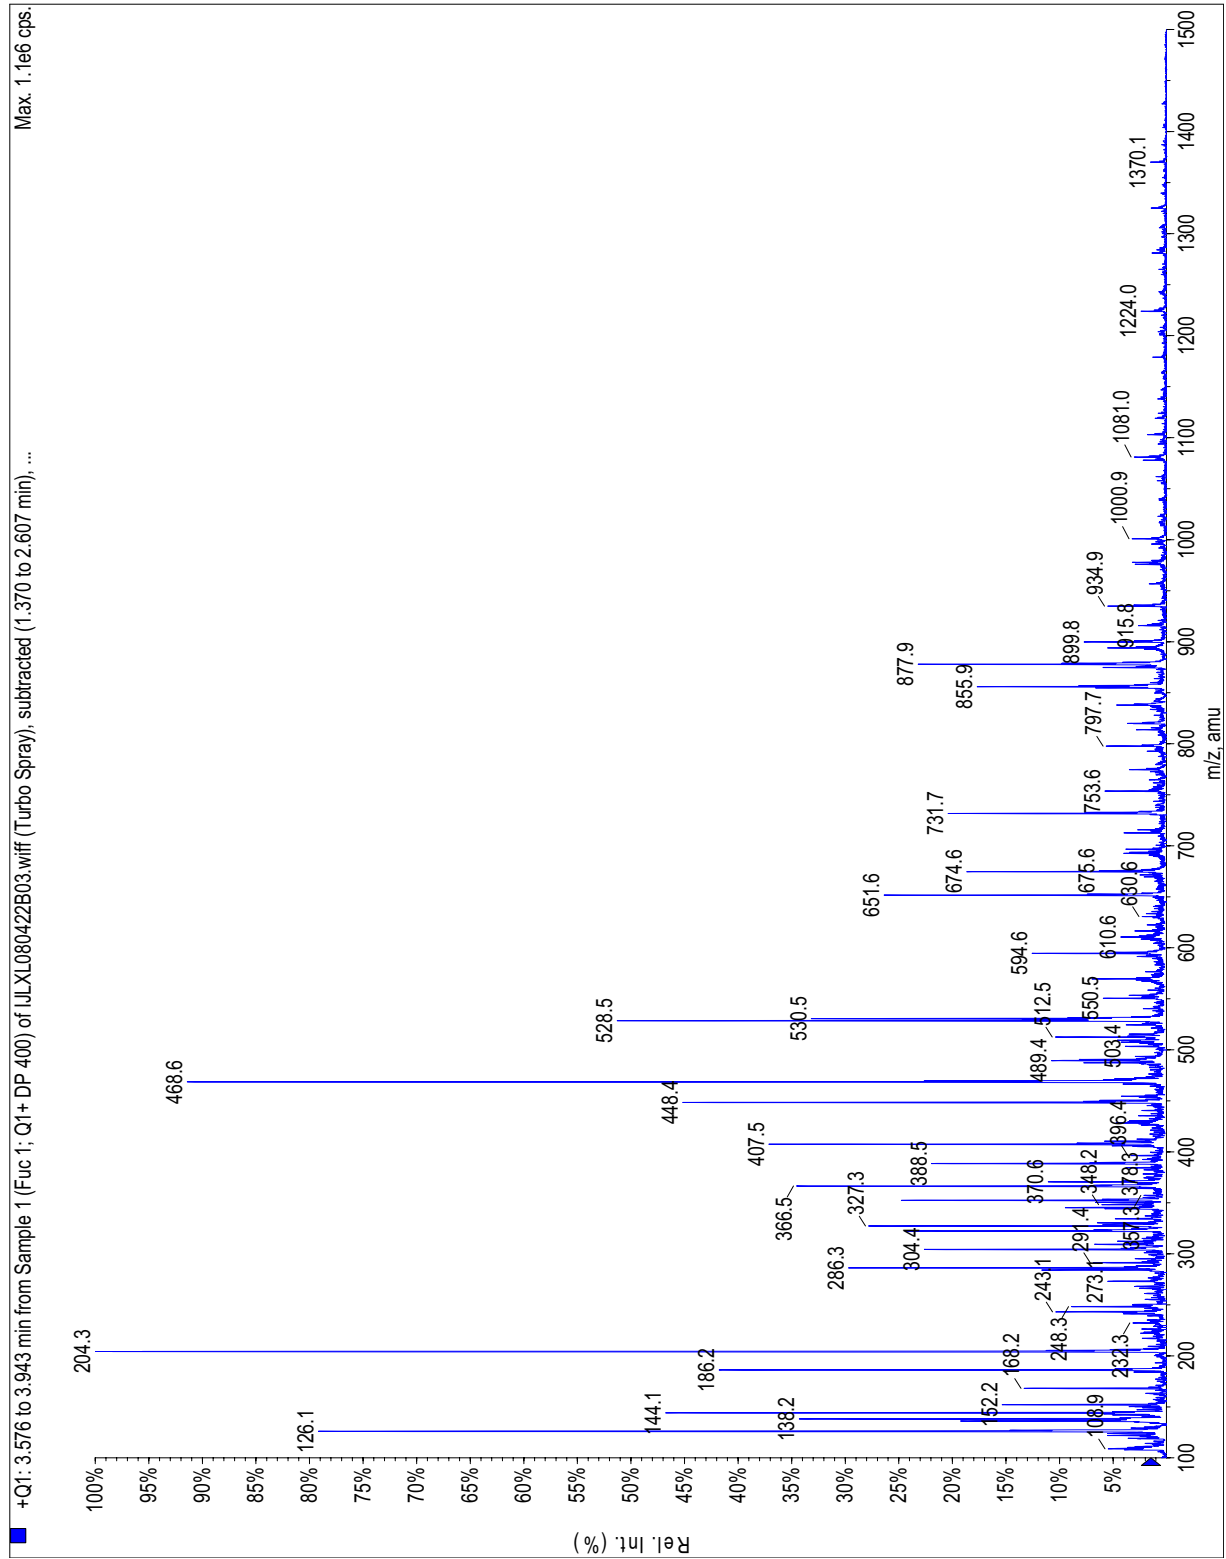

Fig. S5. MS spectra of intact LPSs.

B. MS spectrum of LPS (3)

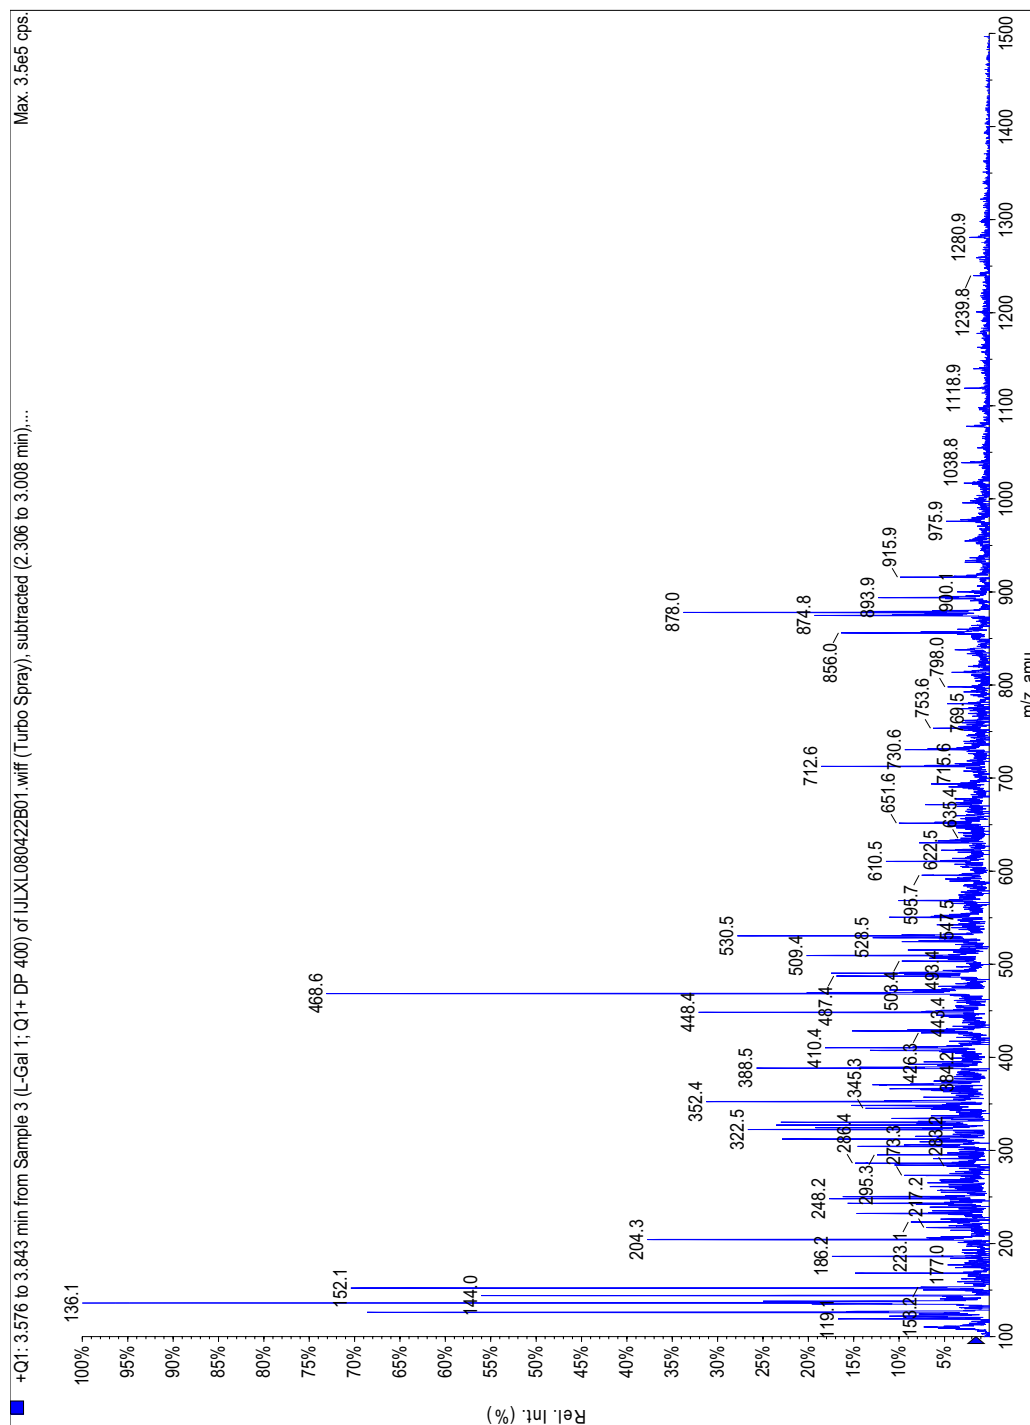

Fig. S5. (continued).

C. MS spectrum of LPS (2)

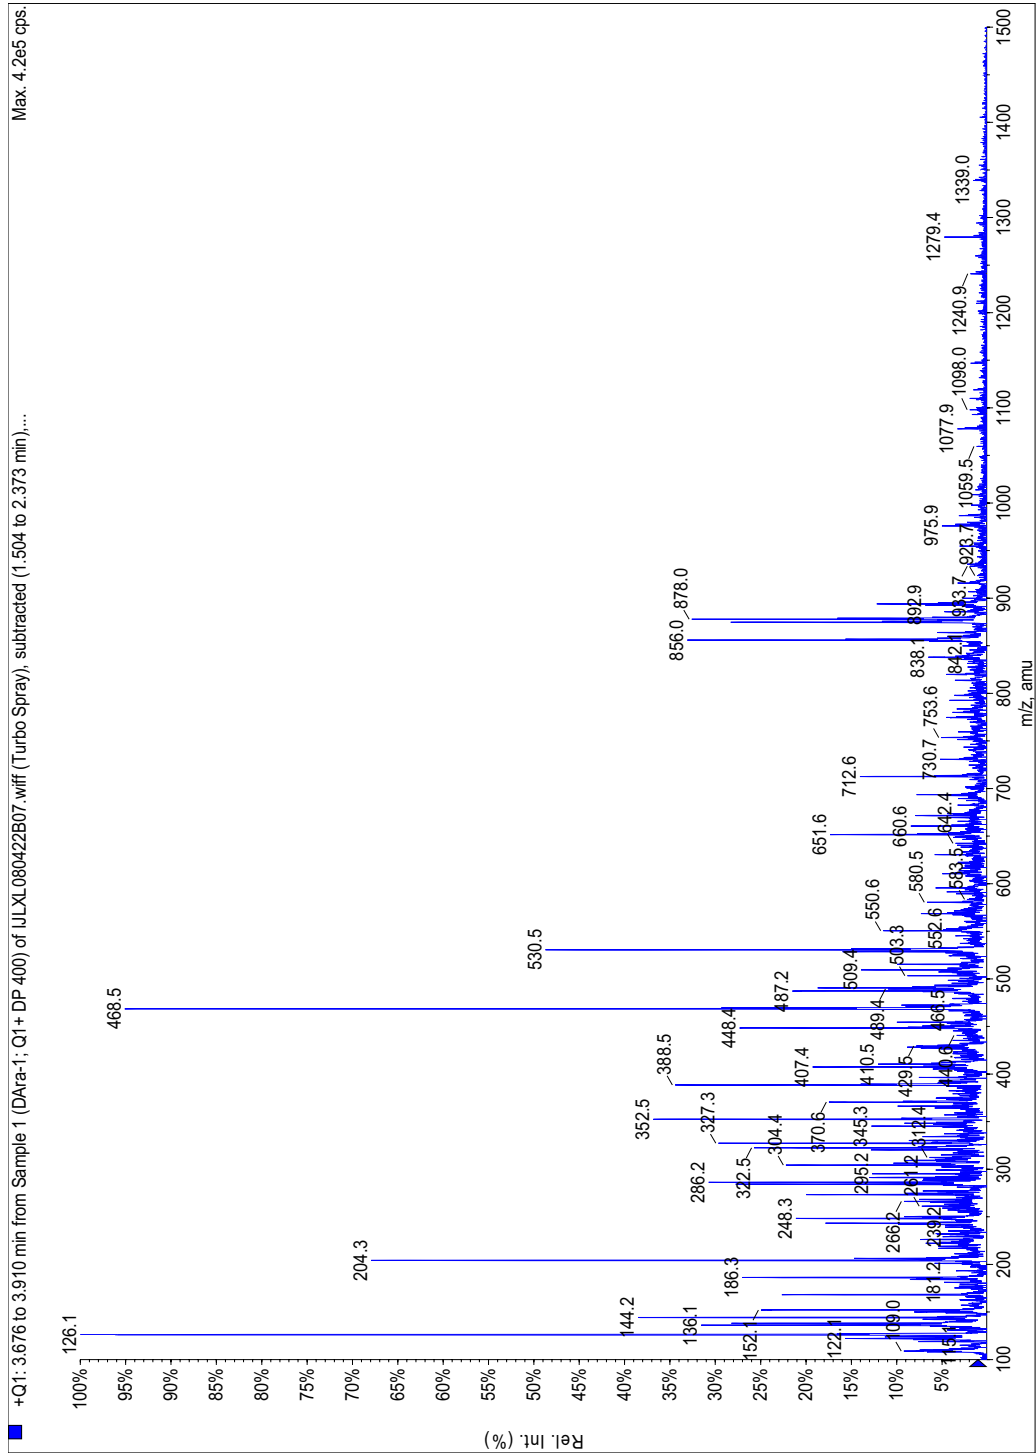

Fig. S5. (continued).

D. MS spectrum of LPS (4)

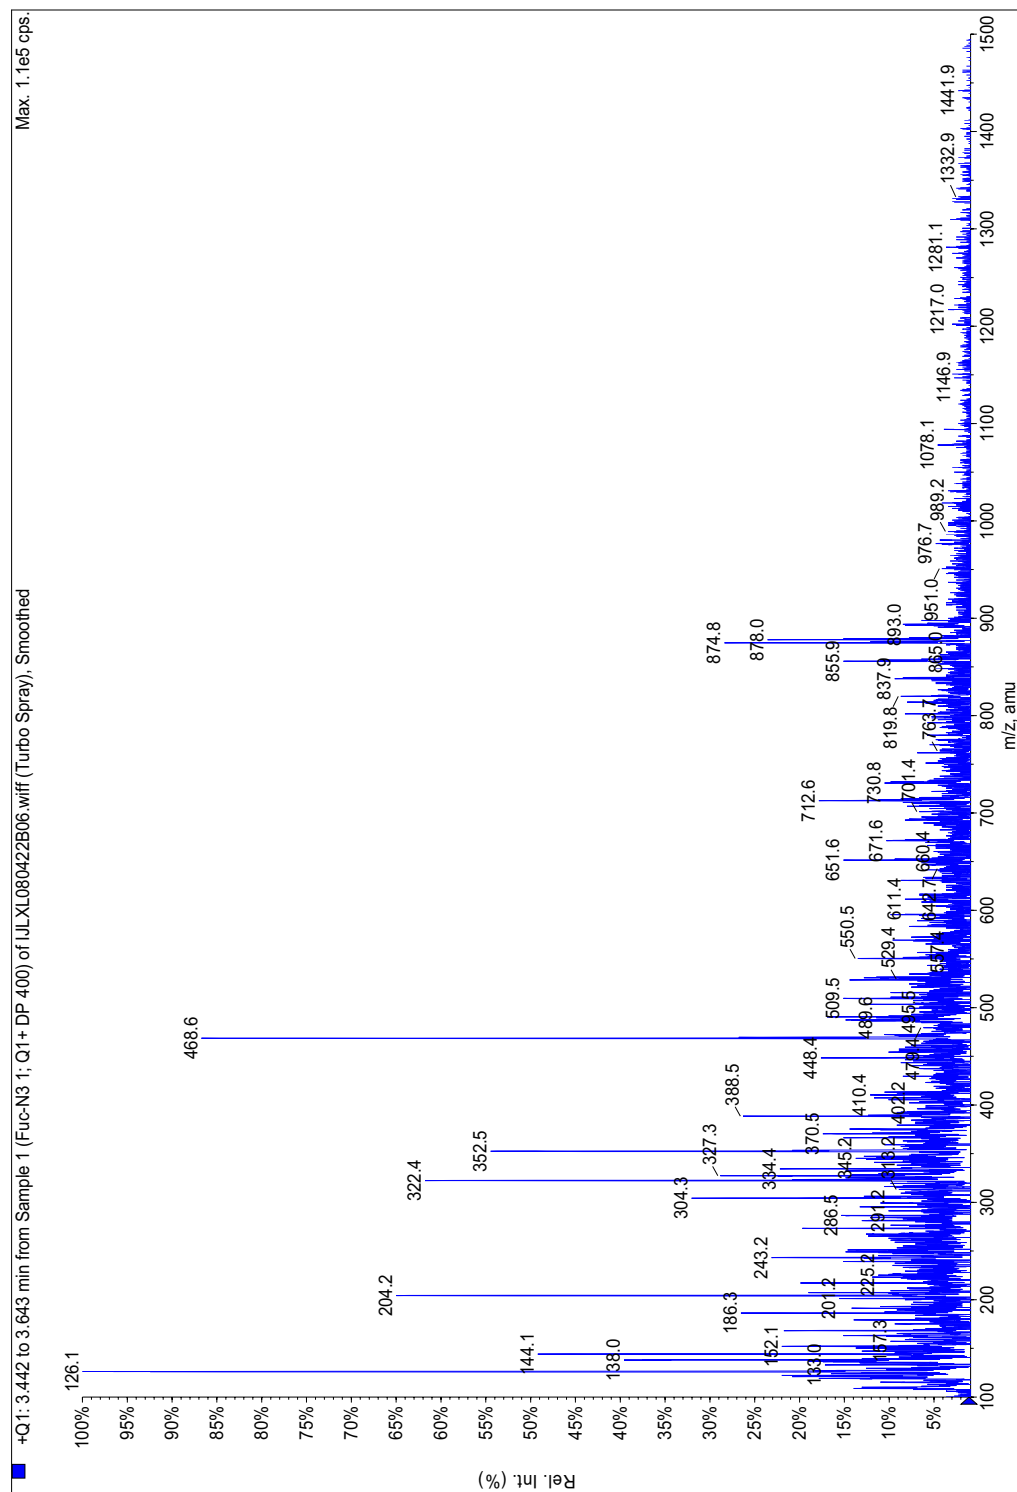

Fig. S5. (continued).

### E. MS spectrum of LPS (5)

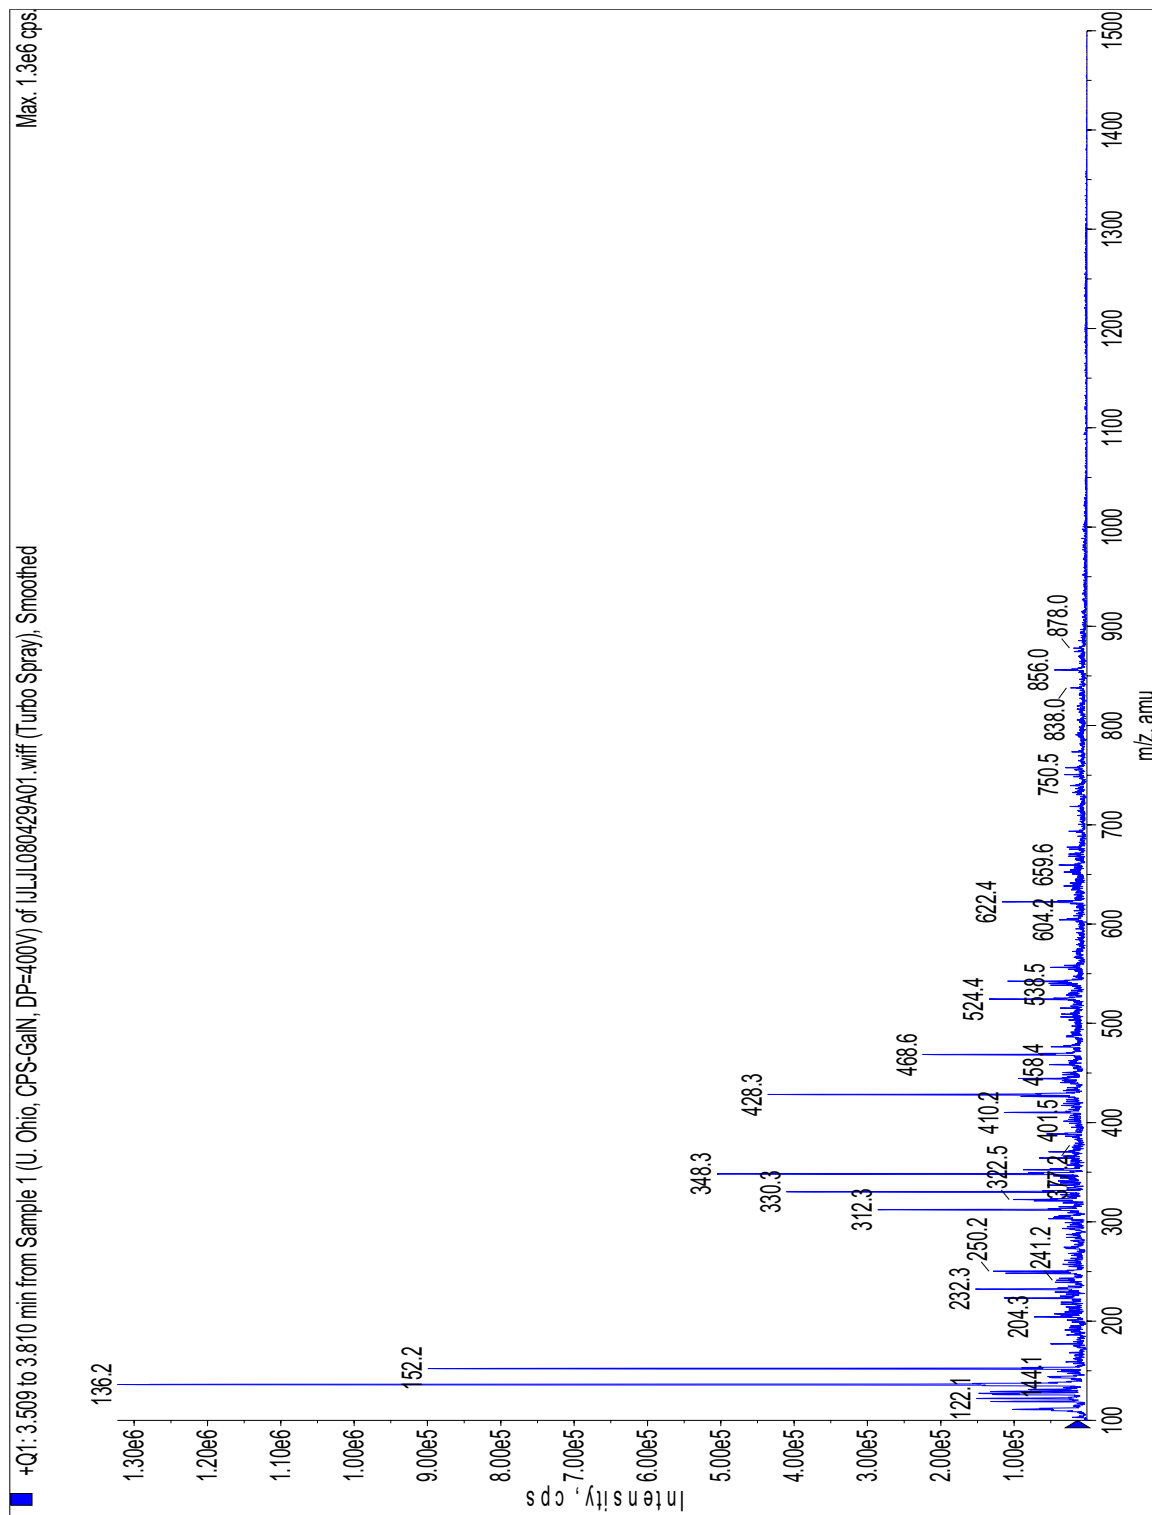

Fig. S5. (continued).

F. MS spectrum of LPS (6)

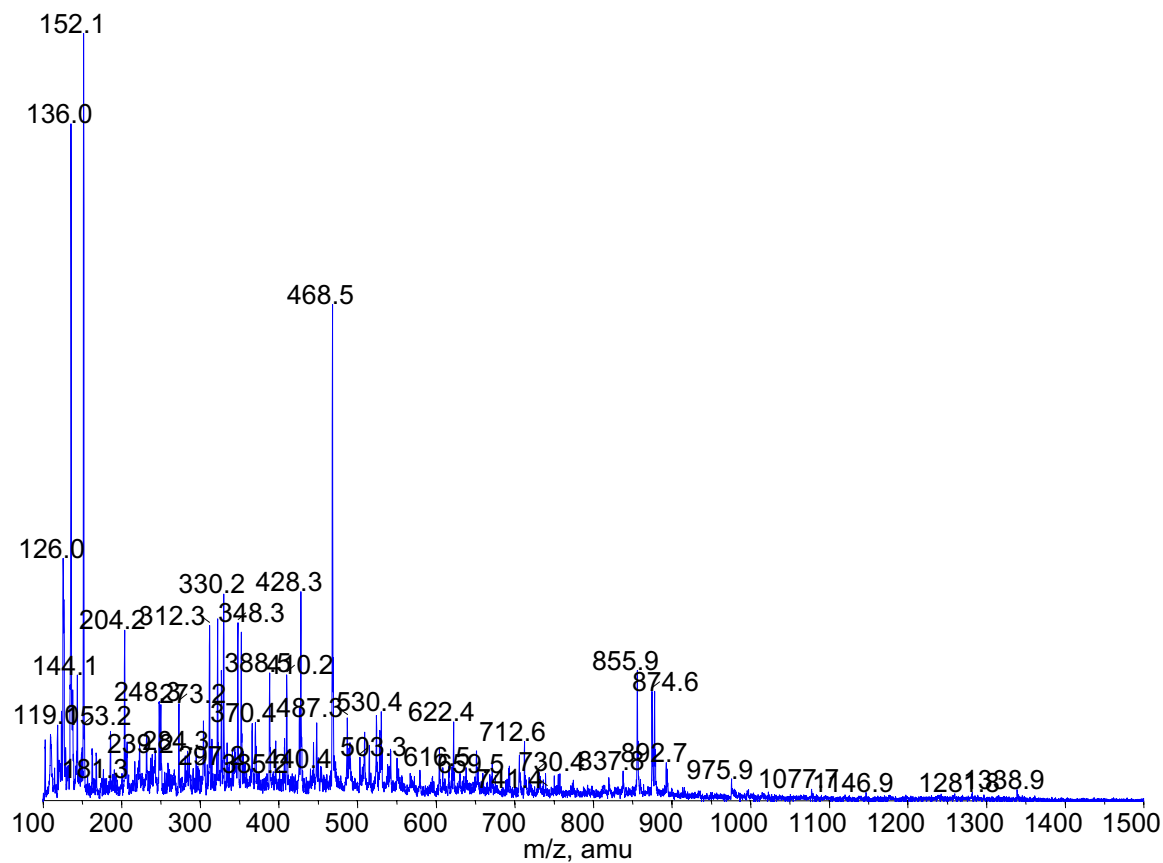

Fig. S5. (continued).

G. MS spectrum of LPS (7)

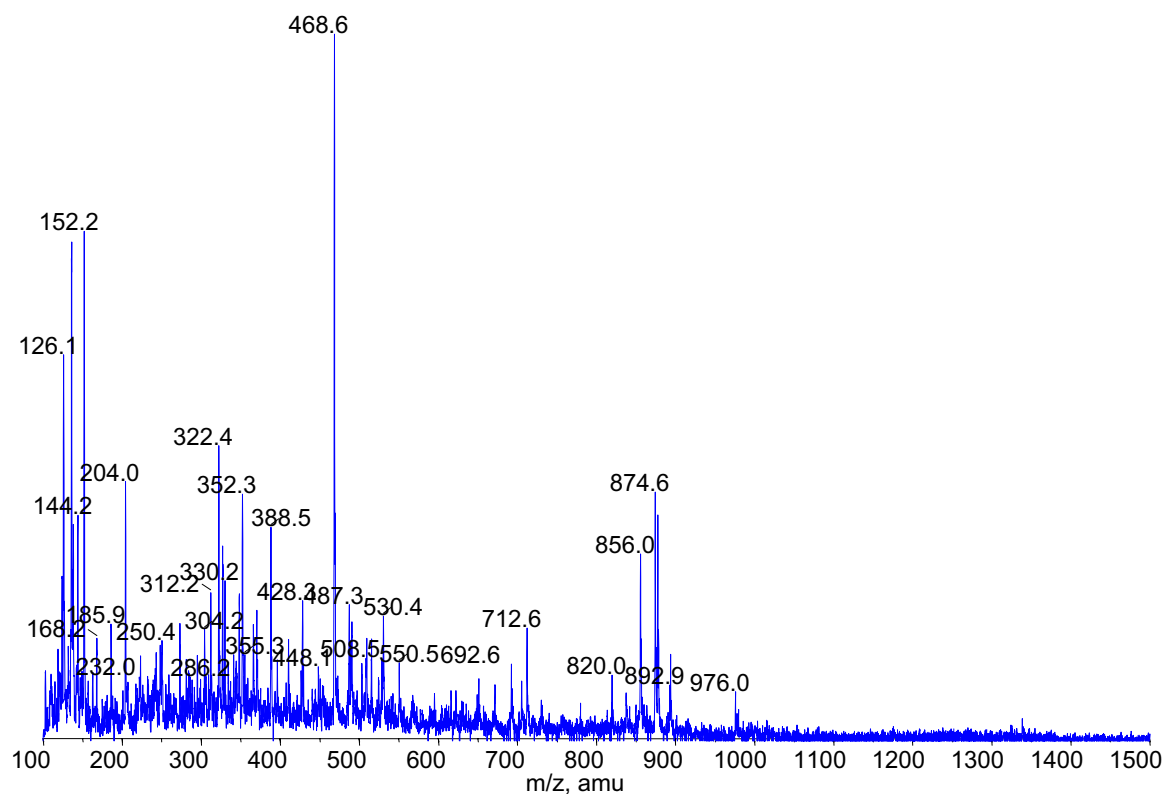

Fig. S5. (continued).

## H. MS spectrum of LPS (8)

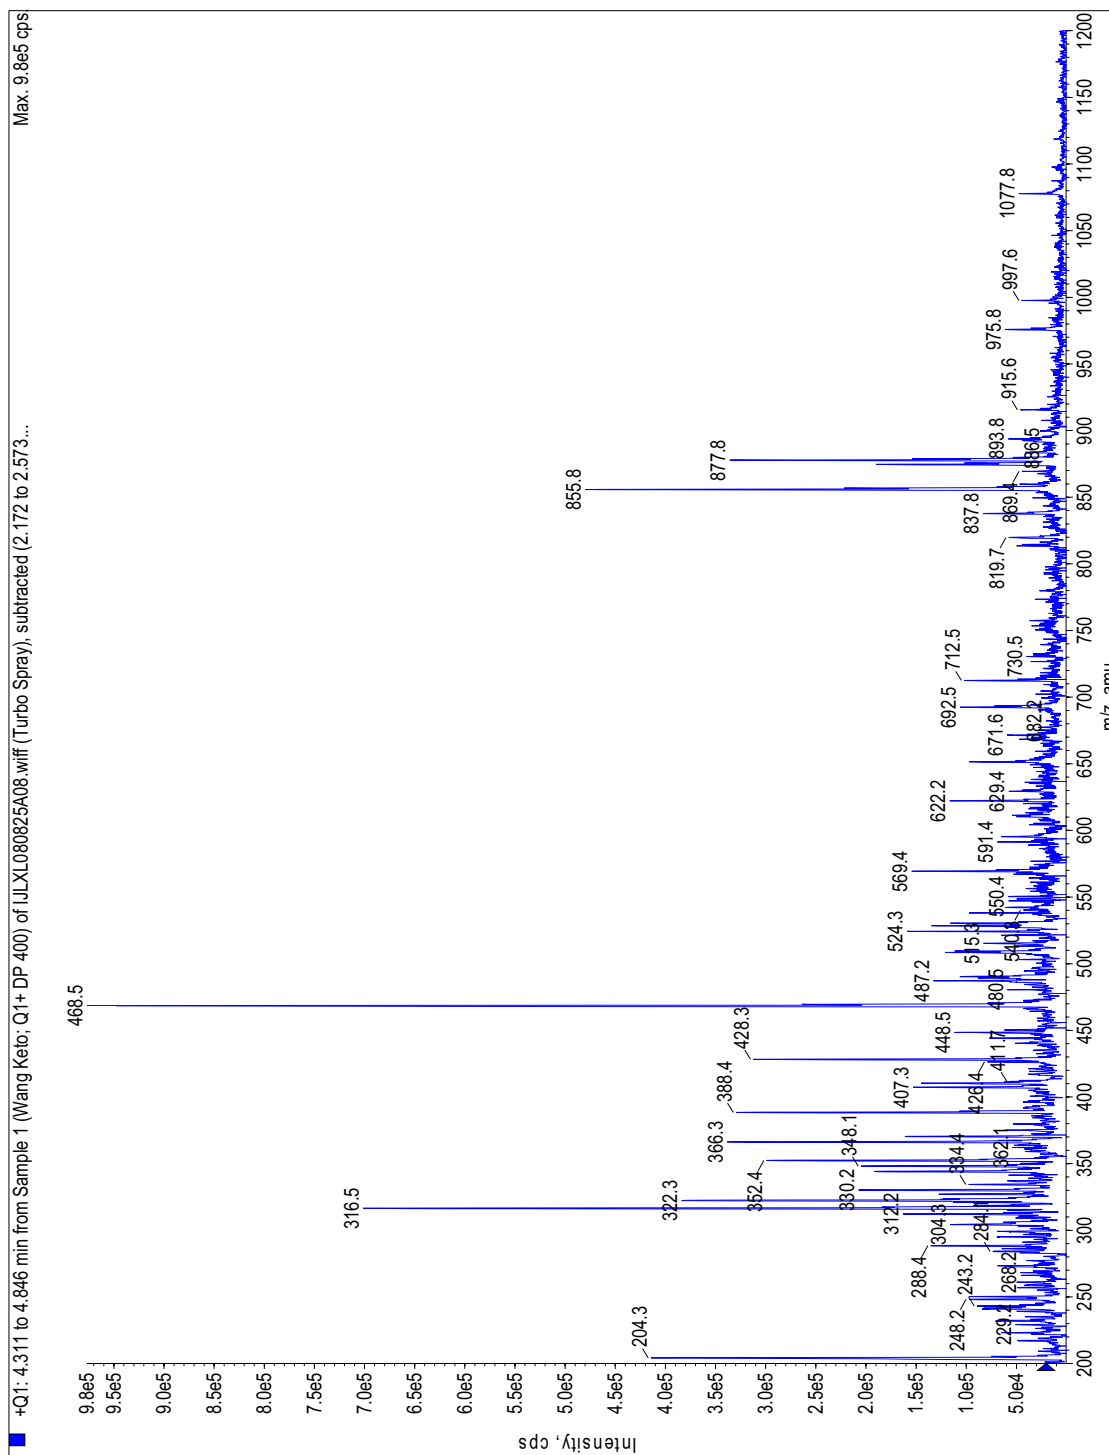

Fig. S5. (continued).



# I. MS spectrum of LPS (9)

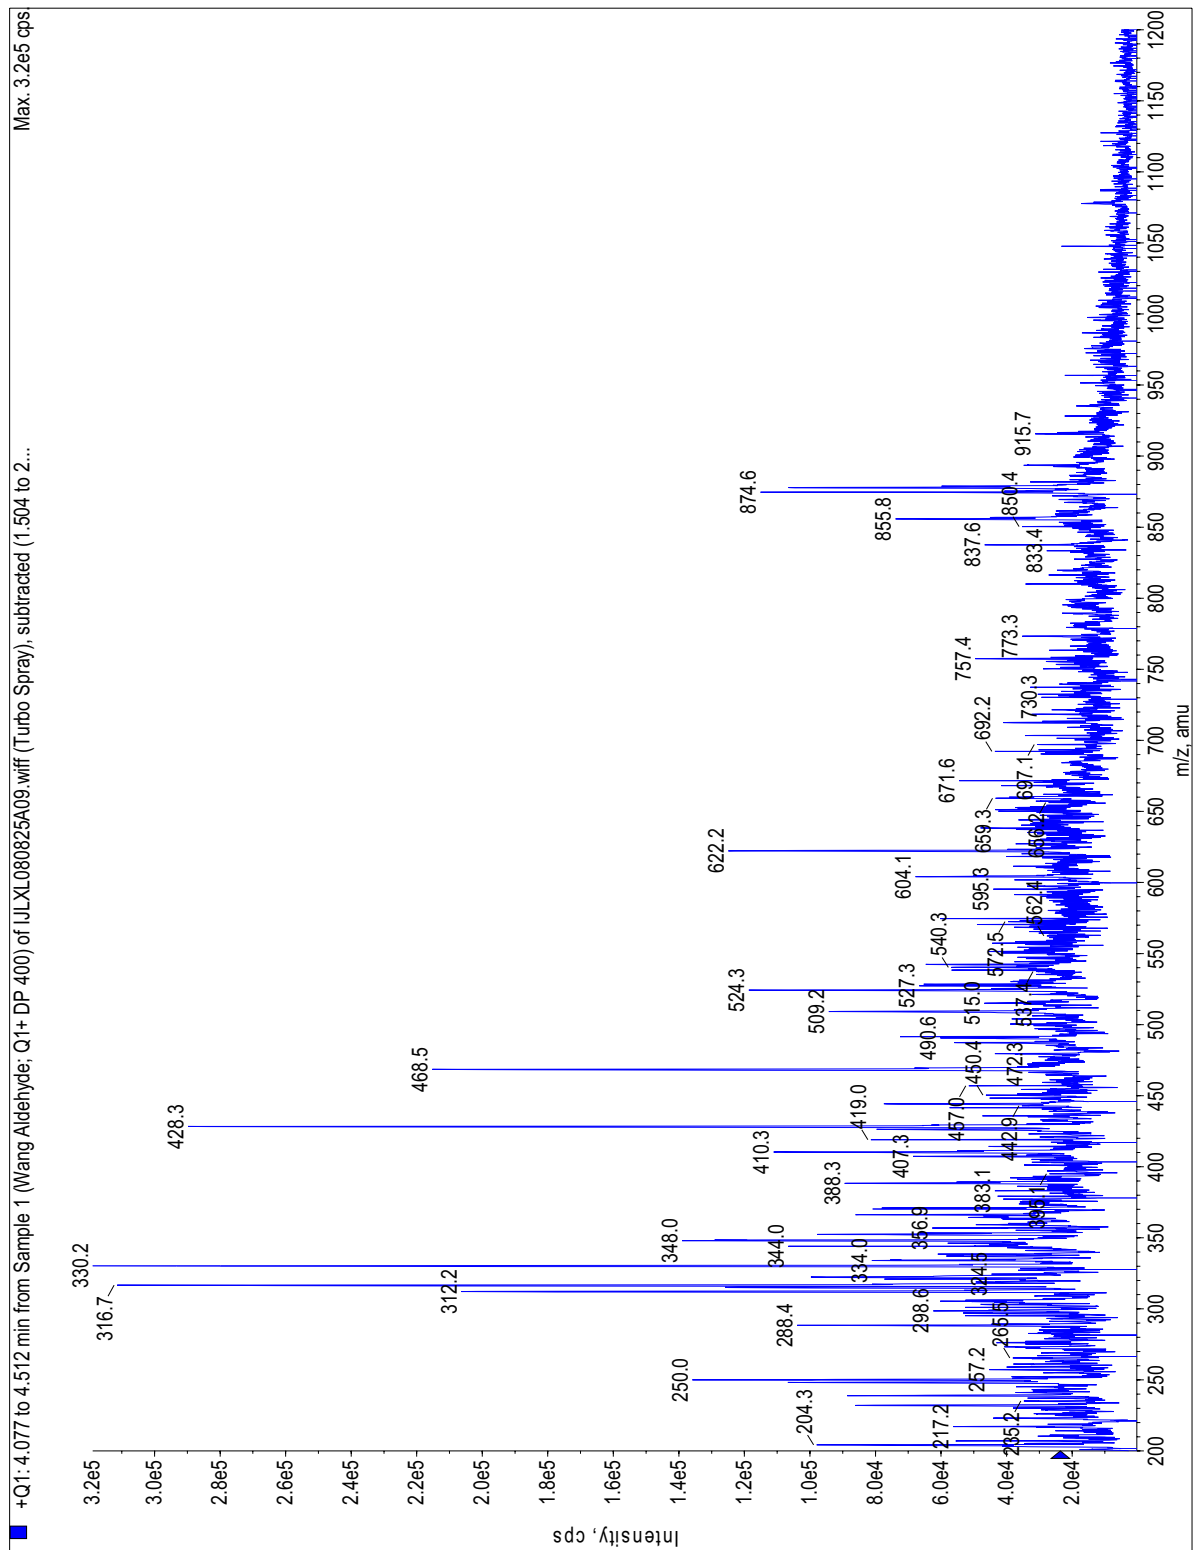

Fig. S5. (continued).

J. MS spectrum of LPS (10)

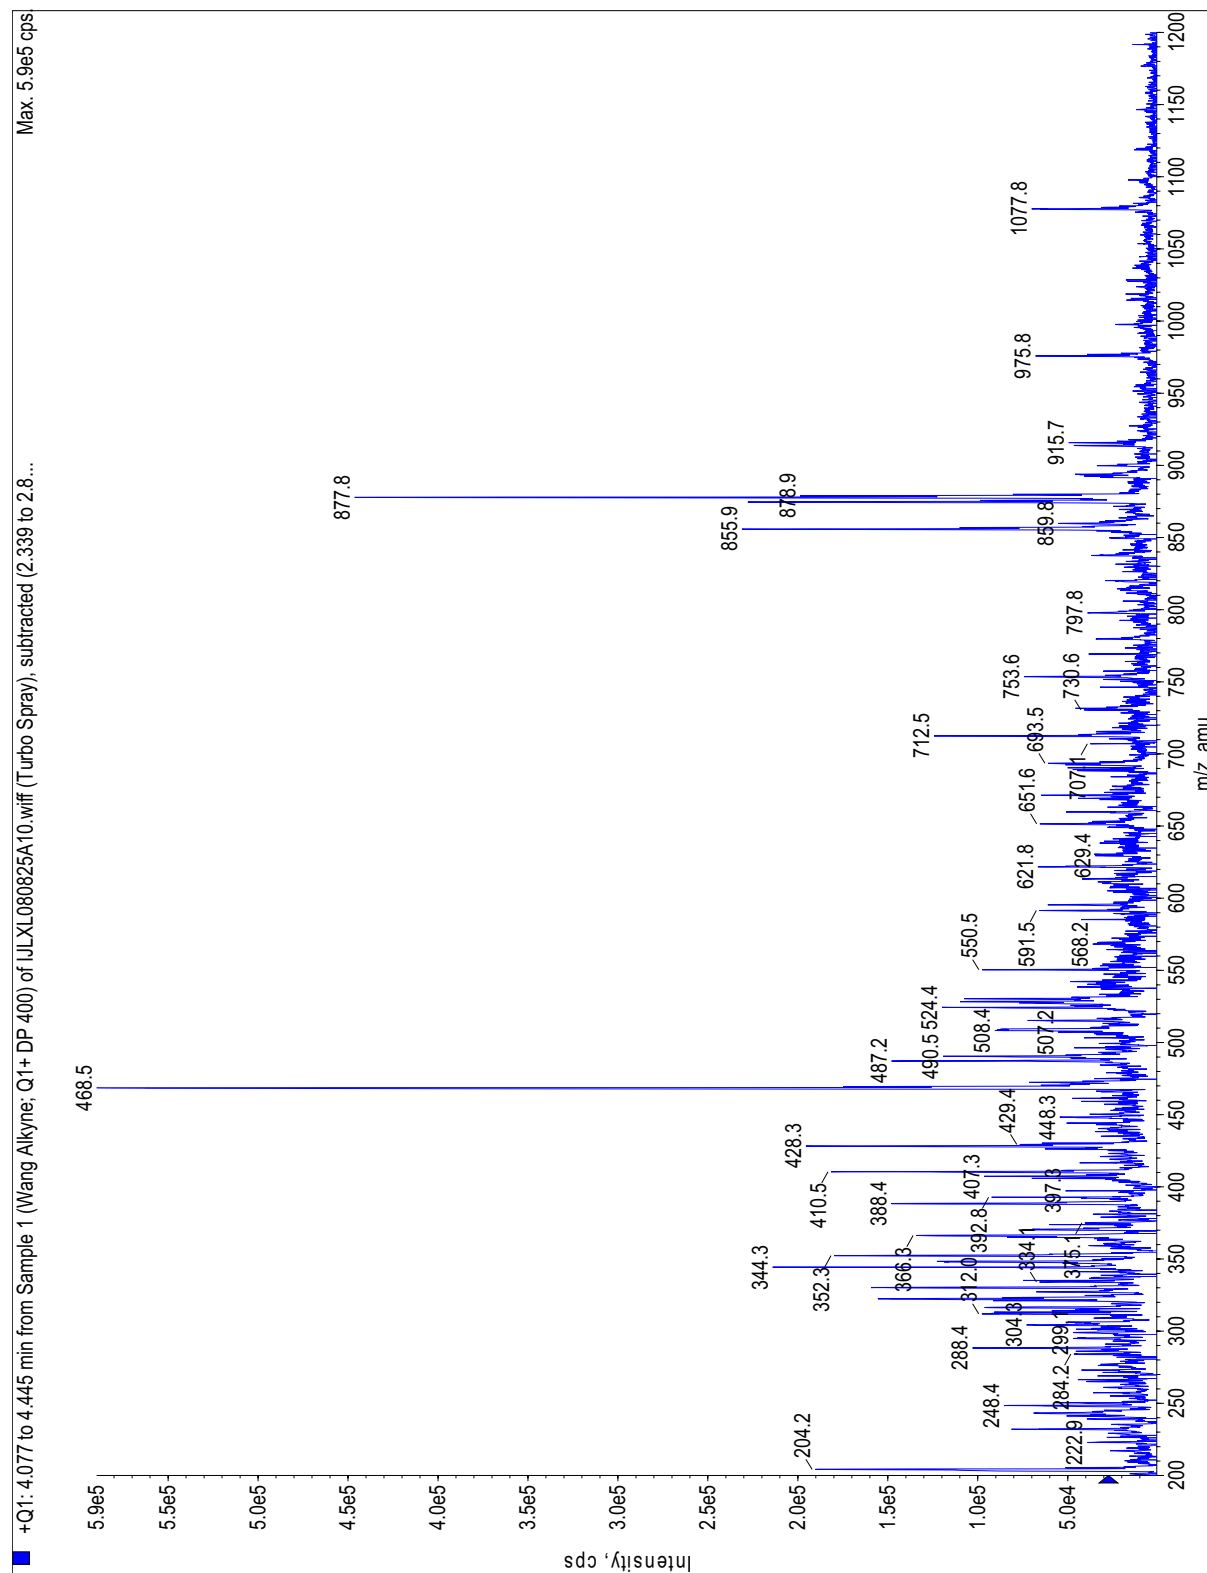

Fig. S5. (continued).

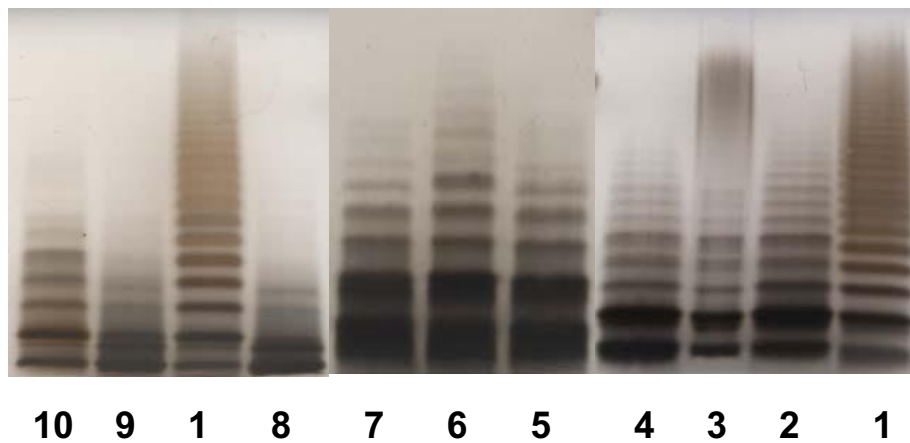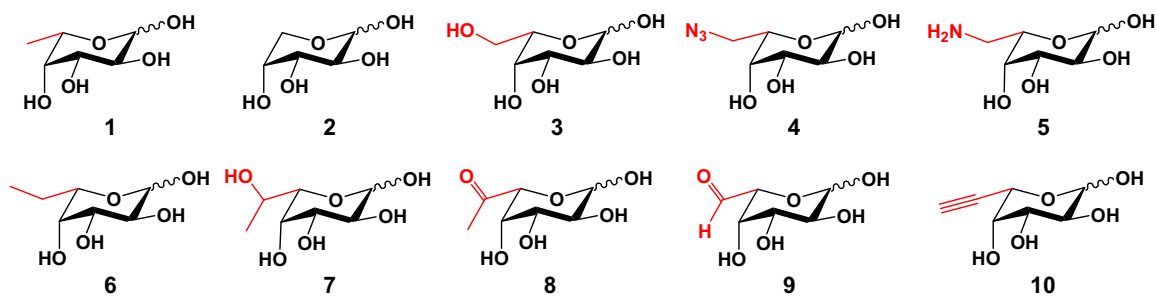

Fig. S6. Analysis of LPSs fed with different fucose analogs. Chemical structures of compounds are shown.

## A. compound 5

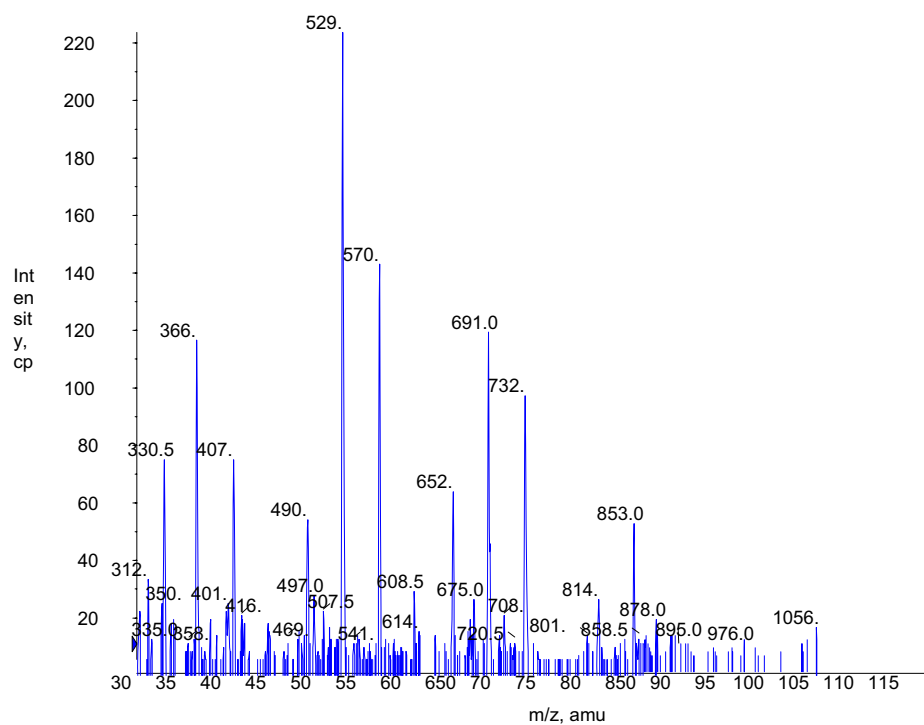

Fig. S7. Precursor-treated MS spectra.

B. compound 6

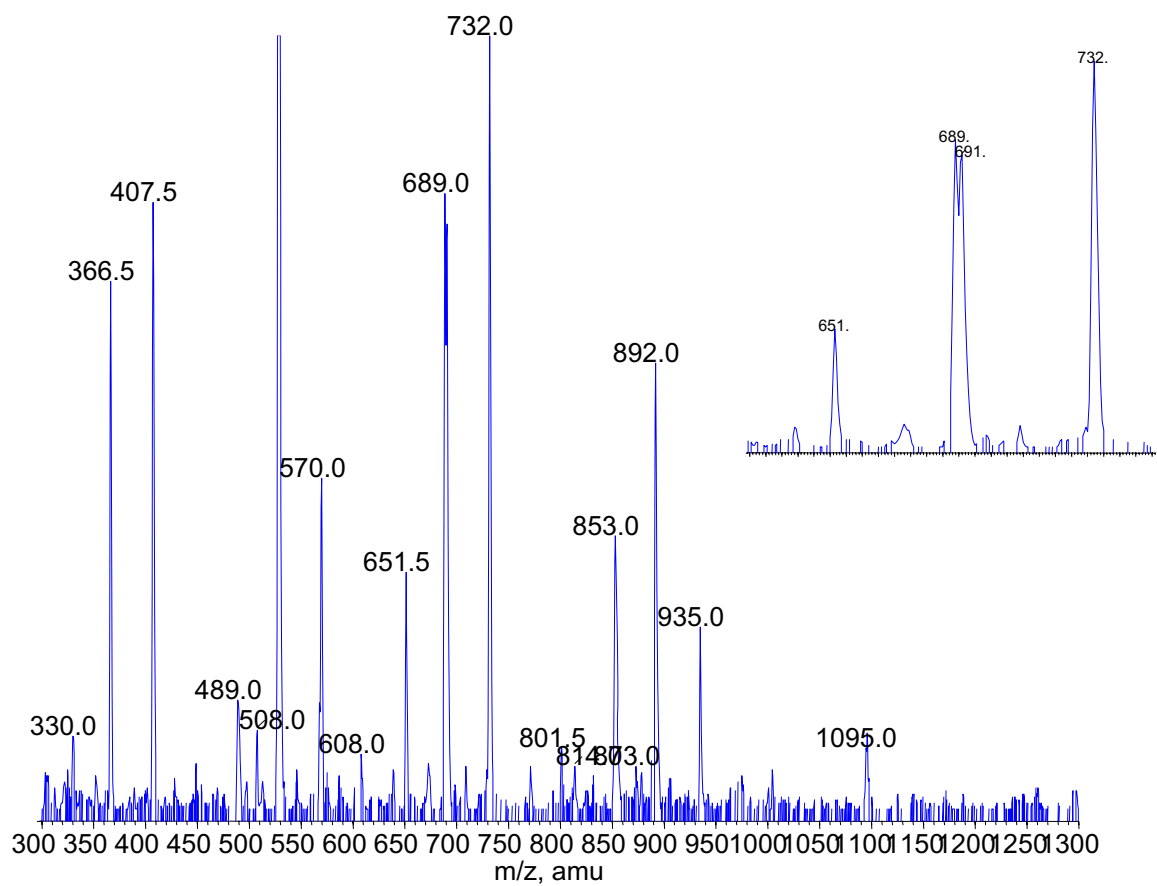

Fig. S7. (continued).

C. compound 7

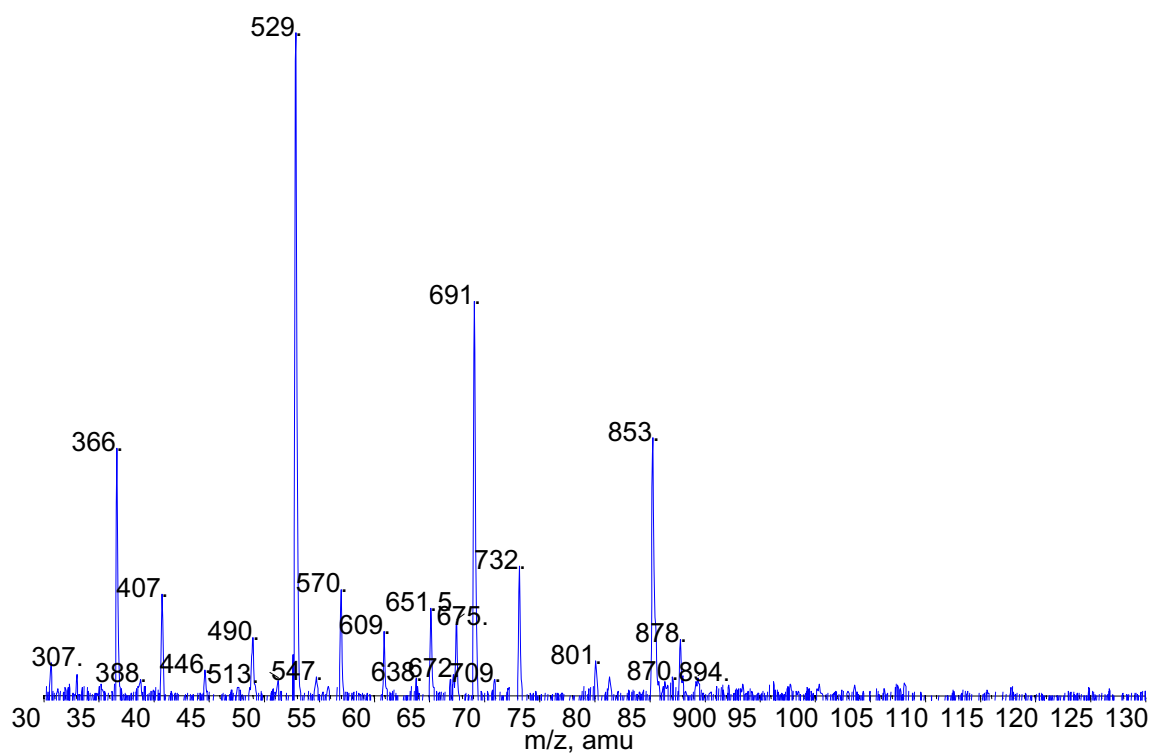

Fig. S7. (continued).

## D. compound 10

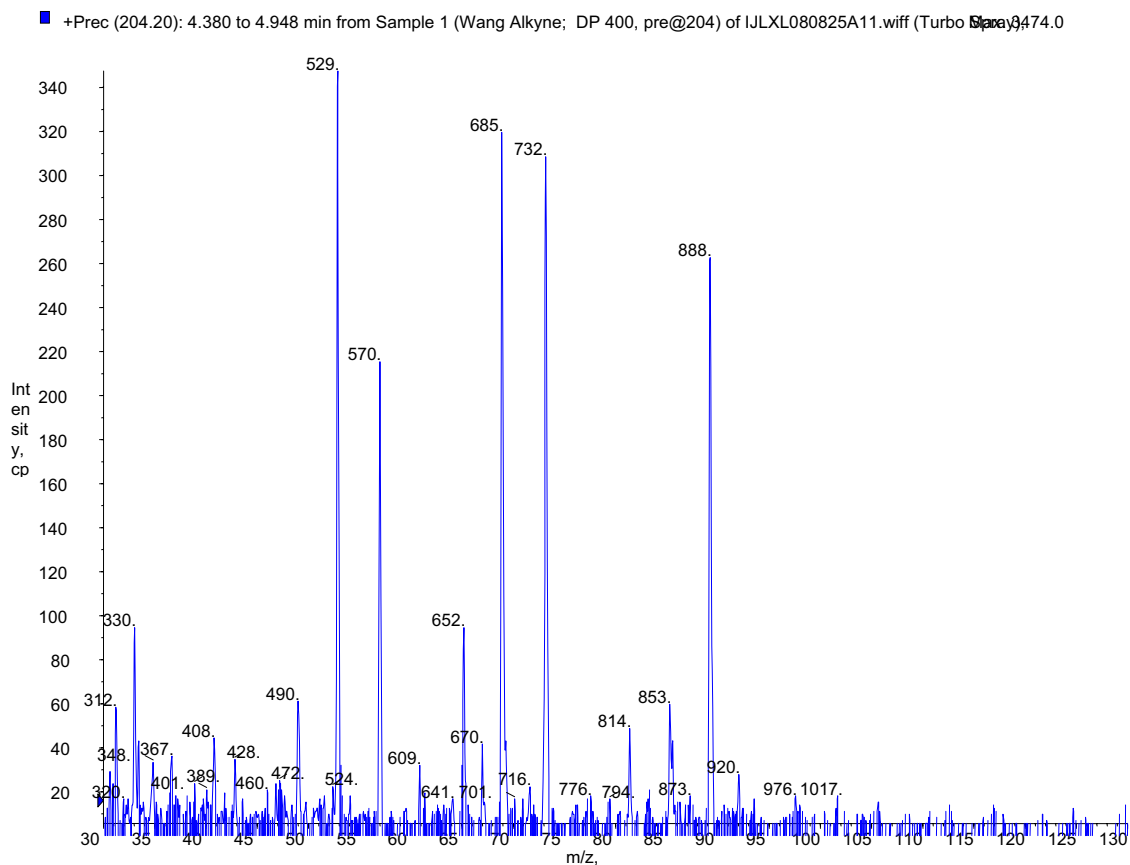

Fig. S7. (continued).

|                   |   |   |   |   |
|-------------------|---|---|---|---|
| fucN <sub>3</sub> | + | + | + | - |
| fuc               | - | - | - | + |
| Cu <sup>2+</sup>  | + | - | + | + |
| TCEP              | + | + | - | + |
| Ligand            | + | + | + | + |

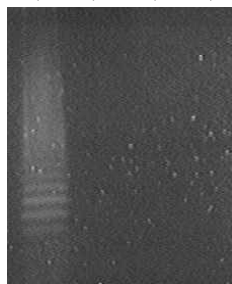

1 2 3 4

Fig. S8. Control experiments for in vitro polysaccharide labeling.

## Other Supporting Information Files

[SI Appendix](#)
